# Supplementary material
Source: publisher figshare collection journal article supplement (https://acs.figshare.com/ndownloader/files/14342531)
Supplement: Supplementary file 1 [file 14342531]

# Supporting Information

## **"Ultra-mixing": a Simple and Effective Method to Obtain Controlled and Stable Dispersions of Graphene Oxide in Cell Culture Media**

Giacomo Reina,<sup>a,\*</sup> Amalia Ruiz,<sup>a</sup> Diane Murera,<sup>a</sup> Yuta Nishina,<sup>b,c</sup> Alberto Bianco<sup>a,\*</sup>

<sup>a</sup> University of Strasbourg, CNRS, Immunology, Immunopathology and Therapeutic Chemistry, UPR 3572, 67000 Strasbourg, France

<sup>b</sup> Graduate School of Natural Science and Technology, Okayama University, Tsushimanaka, Kita-ku, Okayama 700-8530, Japan

<sup>c</sup> Research Core for Interdisciplinary Sciences, Okayama University, Tsushimanaka, Kita-ku, Okayama 700-8530, Japan

Corresponding author: [a.bianco@ibmc-cnrs.unistra.fr](mailto:a.bianco@ibmc-cnrs.unistra.fr); [g.reina@ibmc-cnrs.unistra.fr](mailto:g.reina@ibmc-cnrs.unistra.fr)

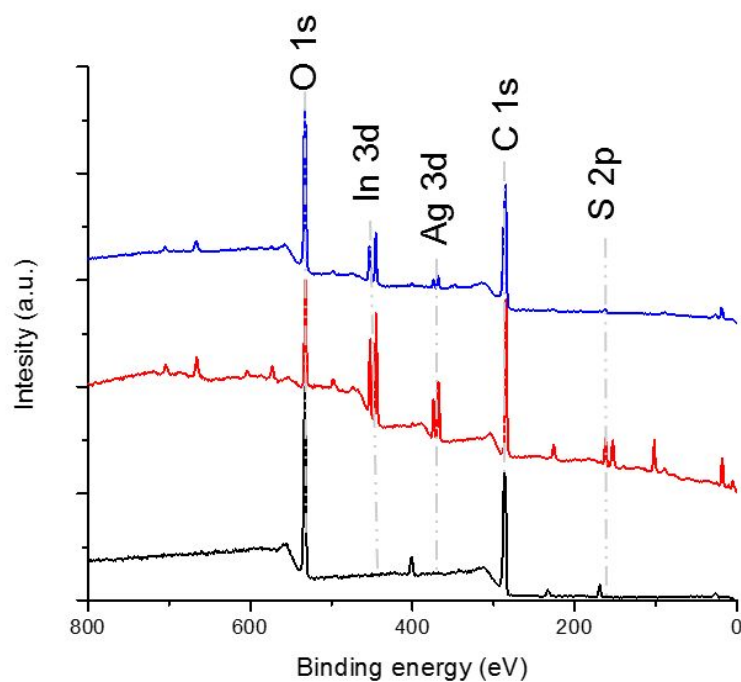

**Figure S1.** XPS characterization of GO (black line), QD [At% C 40%, O 25%, N 3%, In 8% Ag 8%, Zn 2% S 15%] (red line) and GO-QD (blue line).

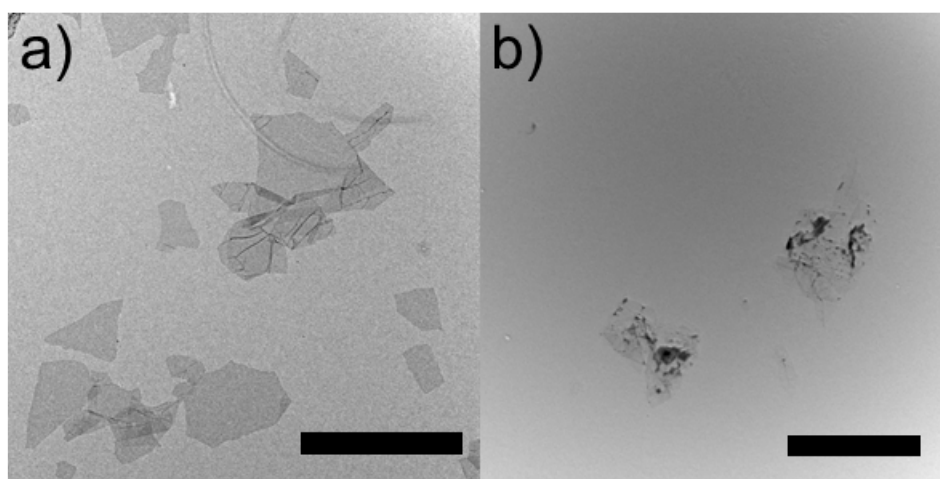

**Figure S2.** Overview TEM image of and a) GO and b) GO-QD Scale bar: 2  $\mu\text{m}$ .

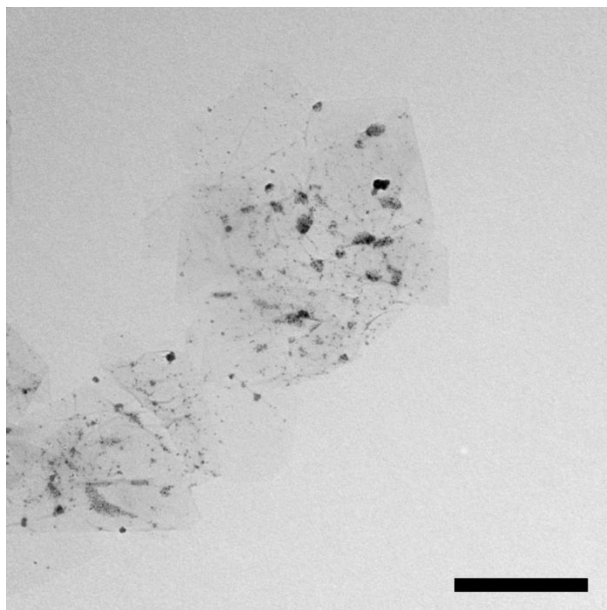

**Figure S3.** TEM image of GO-QD after 1-month aging. Scale bar: 500 nm.

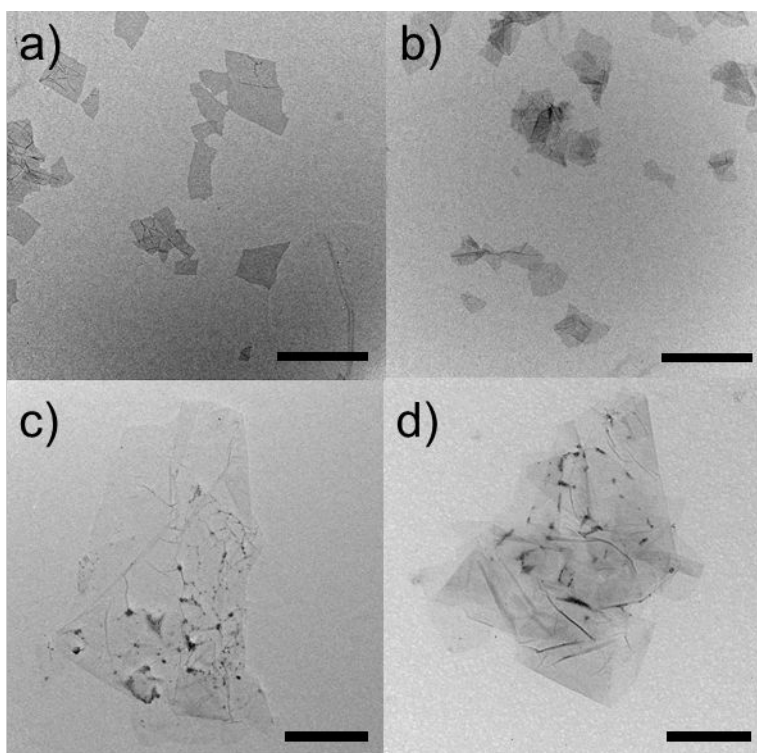

**Figure S4.** TEM images of: GO a) before and b) after Ultra-Turrax treatment. High magnification images of GO-QDs c) before and d) after Ultra-Turrax treatment. Scale bars: a and b 2 $\mu$ m, c and d 500 nm.

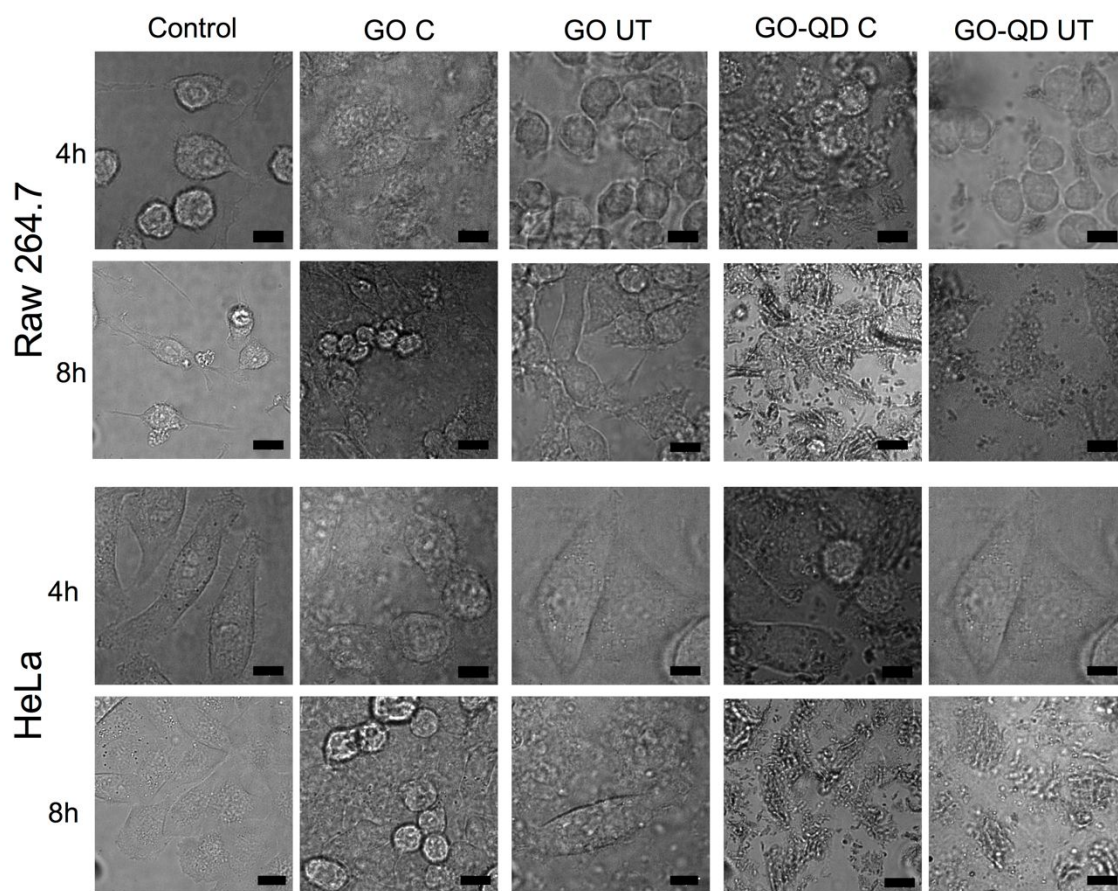

**Figure S5.** Bright field images of Raw 264.7 (upper panel) and HeLa (lower panel) cells after 4 and 8 h of incubation at 20  $\mu\text{g/ml}$  with the different materials. Scale bar: 10  $\mu\text{m}$ .

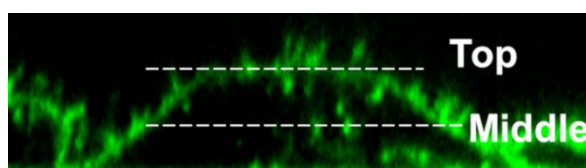

**Figure S6.** Scheme of the planes (top and middle) to assess the internalization efficiency. In green, HeLa cell membrane viewed on the xz plane.

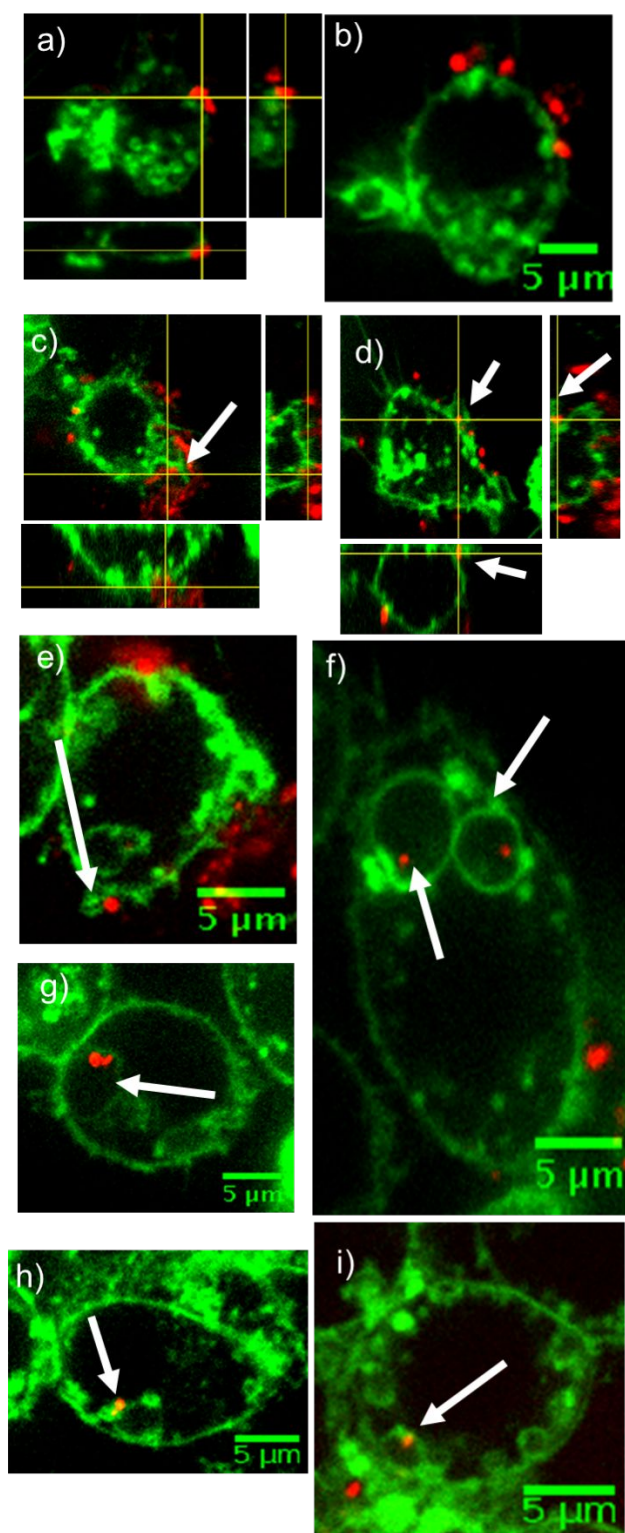

**Figure S7.** Confocal images of Raw 264.7 cell internalization pattern attending the size and aggregation degree of the nanomaterial. GO-QD C after (a) 8 h and (b) 24 h is trapped in the cell membrane. GO-QD UT after (c-e) 8 h and (f-i) 24 h. In panels c-e, the white arrows indicate the formation of membrane protrusions allowing the internalization likely *via* macropinocytosis of GO-QD UT aggregates, while in panels f-i, GO-QD UT are visible inside endocytic vesicles.

**Video S1.** Overlay of the z stacking of Raw 264.7 after 24 h incubation with 20 µg/ml of GO-QD C. In green, Cell-Mask; in red, GO-QDs.

**Video S2.** Overlay of the z stacking of Raw 264.7 after 24 h incubation with 20 µg/ml of GO-QD UT. In green, Cell-Mask; in red, GO-QDs.

**Video S3.** Overlay of the z stacking of HeLa after 24 h incubation with 20 µg/ml of GO-QD C. In green, Cell-Mask; in red, GO-QDs.

**Video S4.** Overlay of the z stacking of HeLa after 24 h incubation with 20 µg/ml of GO-QD UT. In green, Cell-Mask; in red, GO-QDs.
